# Supplementary material
Source: PubMed Central journal article supplement (PMC3116425)
Supplement: 1017248108_pnas.201017248SI.pdf [file 1017248108_pnas.201017248SI.pdf]

# Supporting Information

Matsui et al. 10.1073/pnas.1017248108

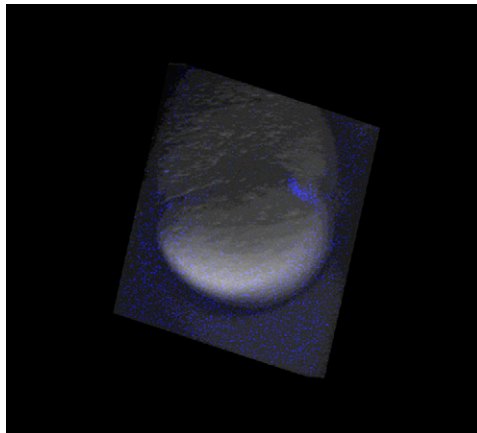

**Movie S1.** This movie shows the dorsal-lateral view of a  $DFC^{\text{control-MO}}$  embryo labeled with SYTO17 to reveal DFC migration. The time lapse covers a period of ~80 min during the epiboly stages. By following cells during the course of the movie, we confirmed that the DFC cluster migrates downward during epiboly movements.

[Movie S1](#)

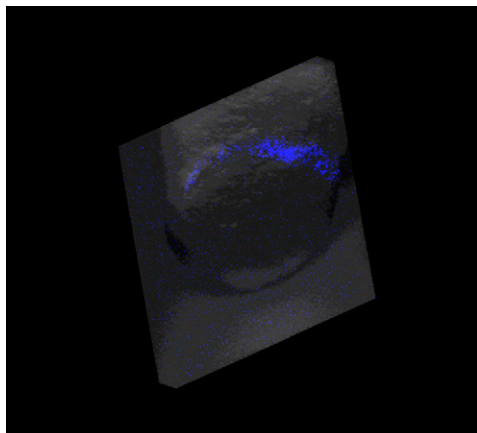

**Movie S2.** This movie shows the dorsal-lateral view of a  $DFC^{\text{cnp1-MO}}$  embryo labeled with SYTO17 to reveal DFC migration. The time lapse covers a period of ~80 min. By following cells during the course of the movie, we observed that small DFC populations never assembled even though downward migration occurred normally.

[Movie S2](#)

## Other Supporting Information Files

[SI Appendix \(PDF\)](#)
